# Supplementary material
Source: PubMed Central journal article supplement (PMC6433165)

**Supplemental Table 1: FDA-Approved HBV DNA Quantification Assays**

| <b>Test</b>                                        | <b>Standardized Against</b>  | <b>Amplification and Detection Methods</b>             | <b>LOQ and LOD</b>                                                        | <b>Dynamic Range of Quantification</b>                    |
|----------------------------------------------------|------------------------------|--------------------------------------------------------|---------------------------------------------------------------------------|-----------------------------------------------------------|
| Cobas AmpliPrep/Cobas TaqMan HBV test, version 2.0 | 2 <sup>nd</sup> WHO standard | Real-time PCR<br>Florescent detection                  | LOD = 9.0 IU/ml in plasma and 19.0 IU/ml in serum<br><br>LLOQ of 20 IU/ml | 20 to 1.7 × 10 <sup>8</sup> IU/ml (1.3 to 8.2 log IU/ml), |
| Abbott Real-Time HBV Assay                         | 1 <sup>st</sup> WHO standard | Real-time PCR<br><br>Florescent detection              | LOD =6.4 IU/ml in plasma and 3.8 IU/ml in serum<br><br>LLOQ = 10 IU/ml,   | 10 to 1 × 10 <sup>9</sup> IU/ml (1.0 to 9.0 log IU/ml),   |
| Aptima HBV Quant Assay                             | 3 <sup>rd</sup> WHO standard | Transcription-mediated PCR<br><br>Florescent detection | LOD =5.6 IU/ml in plasma and 4.3 IU/ml in serum<br><br>LLOQ =10 IU/ml     | 10 to 1 × 10 <sup>9</sup> IU/ml (1.0 to 9.0 log IU/ml),   |
| Procleix® Ultrio™ Assay                            | 1 <sup>st</sup> WHO standard | Transcription-mediated PCR<br><br>Florescent detection |                                                                           |                                                           |

**Supplemental Table 2: Role of HBV DNA Testing in Different Clinical Scenarios**

| <b>Diagnosis</b>                                                                                                    | <b>Monitoring in patients off treatment</b>                                                                                                                                                                                                                                                            | <b>Patients on treatment</b>                                                                                                                                                      |
|---------------------------------------------------------------------------------------------------------------------|--------------------------------------------------------------------------------------------------------------------------------------------------------------------------------------------------------------------------------------------------------------------------------------------------------|-----------------------------------------------------------------------------------------------------------------------------------------------------------------------------------|
| Only marker of infection during window phase of acute infection                                                     | Useful to define phases of infection (HBV DNA plus ALT and HBeAg status)                                                                                                                                                                                                                               | Defines response to antiviral therapy: progressive decline in HBV DNA viral load expected<br><br>If failure to achieve $\geq 1$ log decline by week 12 of treatment = nonresponse |
| Marker of HBV infection in persons with chronic HBV infection but HBsAg mutants resulting in falsely-negative HBsAg | Defines thresholds for HBV DNA for consideration of antiviral therapy <ul style="list-style-type: none"> <li>• If HBeAg-positive, HBV DNA <math>&gt; 10,000</math> IU/mL needed</li> <li>• If HBeAg-negative, HBV DNA <math>&gt; 200</math> IU/mL needed</li> </ul> If cirrhosis, any level of HBV DNA | Diagnosis of virologic breakthrough: $\geq 1$ -log increase in HBV DNA from nadir or $\geq 100$ IU/mL if previously undetectable                                                  |
| Identifies occult HBV infection (HBsAg negative, anti-HBc positive and HBV DNA positive)                            | Useful to differentiate HBV flare (increase in ALT and HBV DNA) from ALT elevation unrelated to HBV (increase in ALT without significant change in HBV DNA)                                                                                                                                            | Identifies risk group for liver-related complications among those with decompensated cirrhosis (low versus undetectable HBV DNA on treatment)                                     |

### **Supplemental Figure 1: Diagnostic markers in acute hepatitis B infection**

Following exposure, an eclipse phase of ~8 days occurs, followed by the window phase when HBV DNA is detectable but HBsAg not yet present. HBsAg will be detectable ~35 post-exposure, followed by anti-HBc (first IgM, then IgG), with resolution of infection accompanied by decline in HBsAg and rise in anti-HBc. A second window period may occur between loss of HBsAg and detection of anti-HBs (varies with assays used) – and duration of this time, the only marker of infection is anti-HBc. Note, over time the levels of anti-HBs may decline and become undetectable, again leaving anti-HBc as the only marker of prior HBV exposure.

### **Supplemental Figure 2: Hepatitis B Genotypes**

Of the most common genotypes, B and C are predominantly found throughout Asia, Genotype A and D found in parts of Europe, India and Africa and Genotype E is restricted to West Africa. In North America, the most common genotypes as described by the Hepatitis B Research Network are B (39%) and C (33%), followed by A (18%), D (8%), and E (3%), reflecting the largely foreign-born population of Asian and Africans {Congly, 2013 #23558}<sup>87</sup>. Less commonly found, genotype G is prevalent in parts of Europe and US, genotype H in Central and South America, genotype I in Laos and Vietnam, and the newest, genotype J in the Ryukyu Islands of Japan. Infections with mixed genotypes are also known to occur.

### **Supplemental Figure 3A/B: Precore and Basal Core Promoter Mutations and HBeAg**

The precore mutation (G1896A, codon 28) inhibits translation of the precore protein due to frameshift mutations or premature stop codons (Figure 3A). The BCP (basal core promoter) mutations (nt1742-1849) suppress the production of precore mRNA at the transcriptional level resulting in defective synthesis of HBeAg (Figure 3B).

### **Supplemental Figure 4: Precore Variants and HBV Genotype Associations**

The frequency of the precore variant varies by HBV genotype. The G->A1896 mutant cannot occur in HBV strains containing C at nucleotide 1858 because the change would disrupt the pre-existing C-G Watson Crick base pairing and destabilizes the stem loop, which is critical in the replication cycle of the virus.

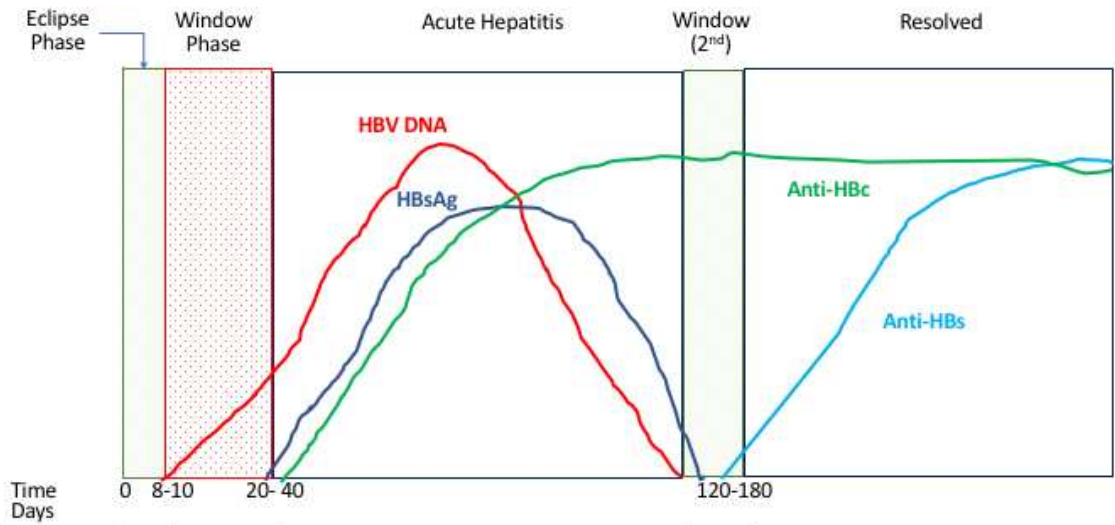

|                         |             |         |                                    |              |                                |
|-------------------------|-------------|---------|------------------------------------|--------------|--------------------------------|
| Useful Diagnostic Tests | N           | HBV DNA | HBsAg<br>Anti-HBc (IgM)<br>HBV DNA | Anti-HBc IgG | Anti-HBc IgG/Total<br>Anti-HBs |
|                         | O<br>N<br>E |         |                                    |              |                                |

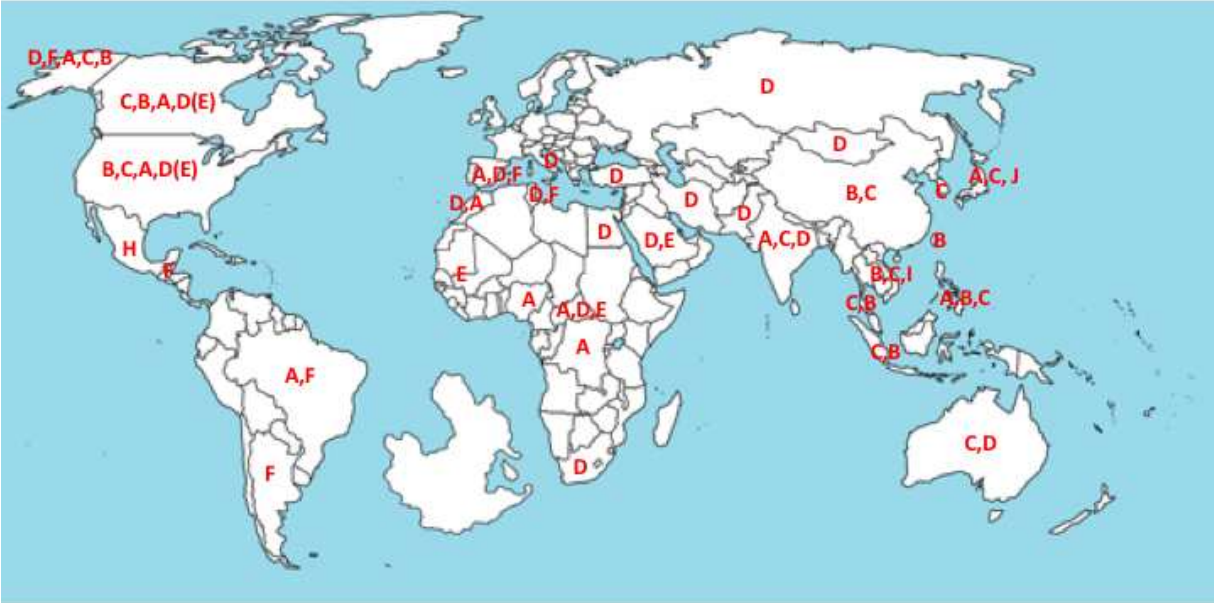

# Precore Variant

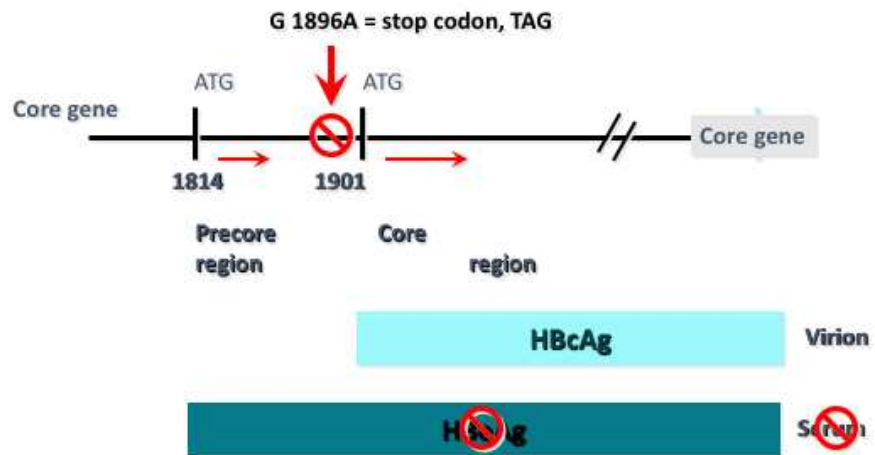

# Double BCP Variants

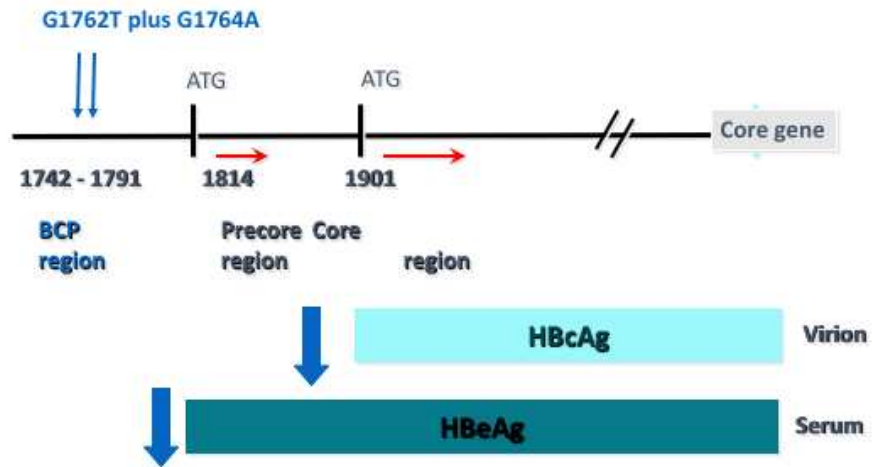

Supplement: NIHMS1514242-supplement-1.pdf [file NIHMS1514242-supplement-1.pdf]
